# Supplementary material for: A carbon dot-encapsulated UiO-type metal organic framework as a multifunctional fluorescent sensor for temperature, metal ion and pH detection
Source: Royal Society of Chemistry journal article supplement (doi:10.1039/c8tc01018h), 2018-01-01
Supplement: c8tc01018h1.pdf [file c8tc01018h1.pdf]

## Electronic Supplementary Information

### Carbon dots encapsulated UiO-type metal organic framework as multifunctional fluorescence sensors for temperature, metal ion and pH detection

Chuanxu Yao,<sup>a</sup> Yan Xu,<sup>\*a</sup> Zhiguo Xia<sup>b</sup>

<sup>a</sup>Department of Chemistry, College of Science, Northeastern University, Shenyang, Liaoning 110819, PR China.

<sup>b</sup>Beijing Municipal Key Laboratory of New Energy Materials and Technologies, School of Materials Sciences and Engineering, University of Science and Technology Beijing, Beijing 100083, PR China.

**\*Corresponding author:** xuyanjl@126.com (Yan Xu); Fax: +86-024-83684533; Tel.: +86-024-83684533.

#### Experimental

**Materials preparation:** All chemicals were commercially available and used as received without purification. Typically,  $\text{ZrOCl}_2 \cdot 8\text{H}_2\text{O}$  (32.2 mg, 1 mmol), 2,5-dihydroxyterephthalic acid ( $\text{BDC}-(\text{OH})_2$ ) (19.8 mg, 1 mmol) and tetraethylammonium bromide (29.8 mg, 1.42 mmol) were mixed and ground in a mortar by hand for 5 min at room temperature. Then the mixtures were transferred into a 25 mL of autoclave, which was crystallized at 180 °C for 24 h. During the hydrothermal process, CDs were formed *in-situ* and encapsulated into  $\text{UiO}-66(\text{OH})_2$  to give the final product of  $\text{CDs@UiO}-66(\text{OH})_2$ , which was cooling to room temperature, and washed with ethanol and dried under vacuum for 2 h at 60 °C.

**Materials characterization:** Powder X-ray diffraction patterns (PXRD) were collected on a X'Pert Pro MRDDY2094 diffractometer with  $\text{Cu-K}\alpha$  radiation ( $\lambda = 1.5418 \text{ \AA}$ ). A scan rate of  $0.0167^\circ \text{ s}^{-1}$  was applied to record the pattern in the  $2\theta$  range of 5–50°. Ultra plus field emission scanning electron microscope (SEM, Hitachi, SU8010) was used to characterize the morphologies of the samples. Transmission electron microscopy (TEM) and high resolution transmission electron microscope (HRTEM) were conducted using a JEM-2100F electron microscopy (JEOL, Japan).  $\text{N}_2$  sorption isotherms were performed on an ASAP 2020 instrument. The X-ray photoelectron spectroscopy (XPS, Thermo Fisher Scientist Co., Theta Probe) was used to study the surface chemical composition of  $\text{CDs@UiO}-66(\text{OH})_2$ .

**Photoluminescence (PL) measurement:** The photoluminescence (PL) spectra and the temperature dependence luminescence properties were measured on a fluorescence spectrophotometer (Horiba FMax-4) attached with a heating furnace (Luma 40™/Horiba4). An electric heating attachment coupled with circulating cooling water pipes were introduced into the sample chamber of fluorescence spectrophotometer (Horiba FMax-4) to carry out the fluorescence measurement at different temperatures.

For the investigation of the relationship of pH and luminescent properties of  $\text{CDs@UiO}-66(\text{OH})_2$ , 3 mg of  $\text{CDs@UiO}-66(\text{OH})_2$  samples were immersed in 3 mL aqueous solution of different pH ranging systematically from 3.0 to 7.0 adjusted by 0.1 M HCl. The solution was sonicated completely for 3 min to form emulsions. The fluorescent intensity of  $\text{CDs@UiO}-66(\text{OH})_2$  solutions at different pH values is monitored with fluorescence spectrometer (Horiba FMax-4).

For the fluorescence response of  $\text{CDs@UiO}-66(\text{OH})_2$  towards various metal ions, including  $\text{Zn}^{2+}$ ,  $\text{Ni}^{2+}$ ,  $\text{Na}^+$ ,  $\text{Mn}^{2+}$ ,  $\text{K}^+$ ,  $\text{Ba}^{2+}$ ,  $\text{Cu}^{2+}$ ,  $\text{Cr}^{3+}$ ,  $\text{Co}^{2+}$ ,  $\text{Cd}^{2+}$ , and  $\text{Fe}^{3+}$ , 3 mg of as-prepared  $\text{CDs@UiO}-66(\text{OH})_2$  were dispersed into

water solution containing  $10^{-2}$  M of different metal ions, and the solutions were sonicated for 3 min to ensure the uniform dispersion of samples. Different quenching effects of various metal ions for the fluorescent intensity of CDs@UiO-66(OH)<sub>2</sub> is monitored with fluorescence spectrometer (Horiba FMax-4).
